# Supplementary material for: Characterization of Cercospora nicotianae Hypothetical Proteins in Cercosporin Resistance
Source: PubMed Central journal article supplement (PMC4608573; doi:10.1371/journal.pone.0140676), 2015-10-16
Supplement: pone.0140676.s003.pdf [file pone.0140676.s003.pdf]

**S1 Table: Species names and Genbank accession numbers of closely related protein sequences to 71cR.** This dataset was used in phylogenetics analysis of closely related sequences and analysis of conserved amino acid residues (Figure 9). Sequences are listed in order of similarity to the 71cR protein sequence.

| <b>Protein from:</b>                                     | <b>Accession number</b> |
|----------------------------------------------------------|-------------------------|
| <i>Cercospora nicotianae</i>                             | AHN52028.1              |
| <i>Cercospora canescens</i>                              | ANSM00000000.1          |
| <i>Coniosporium apollinis</i>                            | XM_007783477.1          |
| <i>Talaromyces stipitatus</i>                            | XM_002479737.1          |
| <i>Pyrenophora teres f. teres</i>                        | XM_003300623.1          |
| <i>Cochliobolus sativus</i>                              | XM_007696420.1          |
| <i>Bipolaris zeicola</i>                                 | XM_007708572.1          |
| <i>Bipolaris oryzae</i>                                  | XM_007684791.1          |
| <i>Baudoinia compniacensis</i>                           | XM_007680086.1          |
| <i>Penicillium marneffeii</i>                            | XM_002143429.1          |
| <i>Pyrenophora tritici-repentis</i>                      | XM_001935618.1          |
| <i>Aspergillus terreus</i>                               | XM_001209907.1          |
| <i>Aspergillus clavatus</i>                              | XM_001270301.1          |
| <i>Aspergillus niger</i>                                 | XM_001395869.1          |
| <i>Aspergillus oryzae RIB40</i>                          | XM_001823820.1          |
| <i>Laccaria bicolor</i>                                  | XM_001877202.1          |
| <i>Penicillium chrysogenum Wisconsin 54-1255</i>         | XM_002566213.1          |
| <i>Stereum hirsutum</i>                                  | XM_007305684.1          |
| <i>Trametes versicolor</i>                               | XM_008042907.1          |
| <i>Neosartorya fischeri</i>                              | XM_001257415.1          |
| <i>Cladophialophora psammophila</i>                      | XM_007751287.1          |
| <i>Endocarpon pusillum</i>                               | XM_007789707.1          |
| <i>Capronia coronata</i>                                 | XM_007729994.1          |
| <i>Schizophyllum commune</i>                             | XM_003033985.1          |
| <i>Neofusicoccum parvum</i>                              | XM_007580111.1          |
| <i>Sclerotinia sclerotiorum</i>                          | XM_001593942.1          |
| <i>Myceliophthora thermophila</i>                        | XM_003659899.1          |
| <i>Cladophialophora carrionii</i>                        | XM_008729913.1          |
| <i>Chaetomium thermophilum var thermophilum DSM 1495</i> | XM_006691885.1          |
| <i>Thielavia terrestris NRRL 8126</i>                    | XM_003651594.1          |
| <i>Moniliophthora roreri</i>                             | XM_007855888.1          |
| <i>Nectria haematococca mpVI 77-13-4</i>                 | XM_003047637.1          |
| <i>Sordaria macrospora k-hell</i>                        | XM_003348336.1          |
| <i>Dichomitus squalens LYAD-421</i>                      | XM_007363297.1          |
| <i>Cyphellophora europaea</i>                            | XM_008720839.1          |
| <i>Eutypa lata</i>                                       | XM_007798760.1          |
| <i>Fibroporia radiculosa</i>                             | XM_012326576.1          |
| <i>Magnaporthe oryzae</i>                                | XM_003721003.1          |

|                                                     |                |
|-----------------------------------------------------|----------------|
| <i>Capronia epimyces</i>                            | XM_007737565.1 |
| <i>Glarea lozoyensis</i>                            | XM_008087450.1 |
| <i>Exophiala dermatitidis</i>                       | XM_009155252.1 |
| <i>Setosphaeria turcica</i>                         | XM_008023040.1 |
| <i>Metarhizium acridum</i>                          | XM_007814472.1 |
| <i>Cladophialophora yegresii</i>                    | XM_007756823.1 |
| <i>Neurospora tetrasperma</i>                       | XM_009858003.1 |
| <i>Beauveria bassiana</i>                           | XM_008598155.1 |
| <i>Neurospora crassa</i>                            | XM_959108.3    |
| <i>Cordyceps militaris</i>                          | XM_006668701.1 |
| <i>Colletotrichum gloeosporioides</i>               | XM_007283570.1 |
| <i>Togninia minima</i>                              | XM_007915449.1 |
| <i>Moniliophthora perniciosa</i>                    | XM_002389887.1 |
| <i>Cryptococcus neoformans var neoformans</i>       | XM_770297.1    |
| <i>Pestalotiopsis fici</i>                          | XM_007830880.1 |
| <i>Colletotrichum fioriniae</i>                     | XM_007590498.1 |
| <i>Verticillium dahliae</i>                         | XM_009653173.1 |
| <i>Tremella mesenterica</i>                         | XM_007005214.1 |
| <i>Trichoderma reesei</i>                           | XM_006968205.1 |
| <i>Phanerochaete carnosa</i>                        | XM_007397929.1 |
| <i>Exophiala dermatitidis</i>                       | XM_009155251.1 |
| <i>Cryptococcus neoformans var grubii H99</i>       | XM_012194767.1 |
| <i>Gaeumannomyces graminis var tritici</i>          | XM_009229452.1 |
| <i>Ajellomyces capsulatus</i>                       | XM_001538414.1 |
| <i>Aspergillus nidulans</i>                         | XM_676870.1    |
| <i>Ajellomyces_dermatitidis</i>                     | XM_002627550.1 |
| <i>Fomitiporia mediterranea</i>                     | XM_007263484.1 |
| <i>Cryptococcus_neoformans_var_neoformans_JEC21</i> | XM_571231.1    |
| <i>Punctularia_strigosoazonata</i>                  | XM_007389195.1 |
| <i>Phaeosphaeria_nodorum</i>                        | XM_001797871.1 |
| <i>Selaginella moellendorffii</i>                   | XM_002986561.1 |
| <i>Fusarium pseudograminearum</i>                   | XM_009253654.1 |
| <i>Acanthamoeba_castellanii_str_Neff</i>            | XM_004336629.1 |
| <i>Aphanomyces_invadans</i>                         | XM_008868897.1 |
| <i>Mycosphaerella fijiensis</i>                     | XM_007922815.1 |
| <i>Aphanomyces astaci</i>                           | XM_009829655.1 |
| <i>Saprolegnia parasitica</i>                       | XM_012343185.1 |
| <i>Saprolegnia diclina</i>                          | XM_008613522.1 |
| <i>Bipolaris victoriae</i>                          | EUN23032.1     |
| <i>Macrophomina phaseolina</i>                      | EKG13750.1     |
| <i>Rasamsonia emersonii</i>                         | KKA18061.1     |
| <i>Byssochlamys spectabilis</i>                     | GAD97874.1     |
| <i>Pyronema omphalodes</i>                          | CCX10454.1     |
| <i>Oidiodendron maius Zn</i>                        | KIM98742.1     |

|                                                        |                |
|--------------------------------------------------------|----------------|
| <i>Diplodia seriata</i>                                | KKY14719.1     |
| <i>Fistulina hepatica</i>                              | KIY50222.1     |
| <i>Bipolaris maydis</i> C5                             | EMD96047.1     |
| <i>Aspergillus kawachii</i>                            | GAA87712.1     |
| <i>Aureobasidium subglaciale</i>                       | KEQ91447.1     |
| <i>Acremonium chrysogenum</i>                          | KFH47914.1     |
| <i>Cylindrobasidium torrendii</i>                      | KIY67985.1     |
| <i>Penicillium oxalicum</i>                            | EPS31119.1     |
| <i>Rhizoctonia solani</i> AG-1 IB                      | CCO31315.1     |
| <i>Penicillium solitum</i>                             | KJJ25658.1     |
| <i>Fusarium oxysporum</i> f. sp. <i>cubense</i> race 4 | EMT66142.1     |
| <i>Rhizoctonia solani</i> AG-1 IB                      | CEL54868.1     |
| <i>Fusarium oxysporum</i> Fo5176                       | EGU87642.1     |
| <i>Verruconis gallopava</i>                            | KIW09465.1     |
| <i>Laccaria amethystina</i> LaAM-08-1                  | KIK08097.1     |
| <i>Fusarium oxysporum</i> Fo47                         | EWZ46461.1     |
| <i>Rhizoctonia solani</i> AG-8 WAC10335                | KDN46588.1     |
| <i>Fusarium verticillioides</i> 7600                   | EWG47493.1     |
| <i>Aureobasidium melanogenum</i> CBS 110374            | KEQ65606.1     |
| <i>Fusarium oxysporum</i> f. sp. <i>lisi</i> HDV247    | EXA43965.1     |
| <i>Aspergillus ruber</i> CBS 135680                    | EYE90370.1     |
| <i>Fusarium oxysporum</i> FO5C 3-a                     | EWZ00422.1     |
| <i>Penicillium expansum</i>                            | KGO46950.1     |
| <i>Penicillium roqueforti</i> FM164                    | CDM27309.1     |
| <i>Stachybotrys chartarum</i> IBT 40288                | KFA79299.1     |
| <i>Trametes cinnabarina</i>                            | CDO75376.1     |
| <i>Penicillium italicum</i>                            | KGO68117.1     |
| <i>Aspergillus fumigatus</i> var. <i>RP-2014</i>       | KEY83679.1     |
| <i>Aureobasidium namibiae</i> CBS 147.97               | KEQ72741.1     |
| <i>Rhizoctonia solani</i> AG-3 Rhs1AP                  | EUC61276.1     |
| <i>Aspergillus rambellii</i>                           | KKK12032.1     |
| <i>Verticillium alfalfae</i> VaMs.102                  | XP_003007876.1 |
| <i>Talaromyces islandicus</i>                          | CRG86219.1     |
| <i>Botrytis cinerea</i> B05.10                         | XP_001551557.1 |
| <i>Botryobasidium botryosum</i> FD-172 SS1             | KDQ19526.1     |
| <i>Ceriporiopsis subvermispora</i> B                   | EMD36508.1     |
| <i>Aureobasidium pullulans</i> EXF-150                 | KEQ85392.1     |
| <i>Penicillium digitatum</i> Pd1                       | EKV10058.1     |
| <i>Stachybotrys chlorohalonata</i> IBT 40285           | KFA64026.1     |
| <i>Exophiala oligosperma</i>                           | KIW38269.1     |
| <i>Fusarium oxysporum</i> f. sp. <i>melonis</i> 26406  | EXK23376.1     |
| <i>Fomitopsis pinicola</i> FP-58527 SS1                | EPT04819.1     |
| <i>Sphaerobolus stellatus</i> SS14                     | KIJ38456.1     |
| <i>Metarhizium majus</i> ARSEF 297                     | KID96415.1     |

|                                                       |            |
|-------------------------------------------------------|------------|
| <i>Fusarium graminearum</i>                           | CEF74347.1 |
| <i>Metarhizium brunneum</i> ARSEF 3297                | KID79633.1 |
| <i>Exophiala mesophila</i>                            | KIV91274.1 |
| <i>Exophiala aquamarina</i> CBS 119918                | KEF61283.1 |
| <i>Pseudogymnoascus pannorum</i> VKM F-4515 (FW-2607) | KFY55947.1 |
| <i>Metarhizium anisopliae</i>                         | KFG84629.1 |
