# Supplementary material for: Characterization of Cercospora nicotianae Hypothetical Proteins in Cercosporin Resistance
Source: PubMed Central journal article supplement (PMC4608573; doi:10.1371/journal.pone.0140676), 2015-10-16
Supplement: pone.0140676.s004.pdf [file pone.0140676.s004.pdf]

S2 Table: Domain function descriptions, species names, and Genbank accession numbers of proteins with known functions within the NTF2-like super-family. These protein sequences were used for phylogenetics analysis with conserved domains to identify the most closely related characterized homolog of 71cR.

| Domains                                               | Species                                          | Accession number |
|-------------------------------------------------------|--------------------------------------------------|------------------|
| Ca <sup>2+</sup> /calmodulin-dependent protein kinase | <i>Talaromyces islandicus</i>                    | CRG91577.1       |
| Ca <sup>2+</sup> /calmodulin-dependent protein kinase | <i>Aureobasidium namibiae</i> CBS 147.97         | KEQ70053.1       |
| Ca <sup>2+</sup> /calmodulin-dependent protein kinase | <i>Pseudocercospora fijiensis</i> CIRAD86        | EME78224.1       |
| Ca <sup>2+</sup> /calmodulin-dependent protein kinase | <i>Zymoseptoria tritici</i> IPO323               | EGP92285.1       |
| Limonene-1, 2-epoxide hydrolase                       | <i>Cycloclasticus zancles</i> 7-ME               | AGS39004.1       |
| Limonene-1, 2-epoxide hydrolase                       | <i>Neorhizobium galegae</i>                      | WP_046627776.1   |
| Limonene-1, 2-epoxide hydrolase                       | <i>Burkholderia pseudomallei</i>                 | KKI72085.1       |
| Limonene-1, 2-epoxide hydrolase                       | <i>Mycobacterium</i> sp. UM_NZ2                  | WP_046283582.1   |
| Lumazine-binding domain                               | <i>Bacillus azotoformans</i> MEV2011             | KEF37658.1       |
| Lumazine-binding domain                               | <i>Streptococcus pneumoniae</i>                  | CKF20303.1       |
| Lumazine-binding domain protein                       | <i>Clostridium botulinum</i> 202F                | AIY78946.1       |
| Lumazine-binding domain protein                       | <i>Mycobacterium lentiflavum</i>                 | CQD24850.1       |
| Putative lumazine-binding                             | <i>Burkholderia pseudomallei</i>                 | CPH87736.1       |
| MBA1-like protein                                     | <i>Aspergillus parasiticus</i> SU-1              | KJK67754.1       |
| MBA1-like protein                                     | <i>Candida tenuis</i> ATCC 10573                 | EGV65914.1       |
| MBA1-like protein                                     | <i>Saccharomyces kudriavzevii</i> IFO 1802       | EJT42540.1       |
| NTF2-like N-terminal transpeptidase                   | <i>Chryseobacterium taiwanense</i>               | KIC61686.1       |
| NTF2-like N-terminal transpeptidase                   | <i>Riemerella anatipestifer</i> RA-GD            | ADZ12144.1       |
| NTF2-like N-terminal transpeptidase                   | <i>Enterococcus faecium</i> TX1330               | EEI60277.1       |
| Nuclear pore RNA shuttling protein Mtr2               | <i>Saccharomyces cerevisiae</i>                  | CAA82029.1       |
| Nuclear pore RNA shuttling protein Mtr2               | <i>Snodgrassella alvi</i> SCGC AB-598-O11        | KES10753.1       |
| Nuclear pore RNA shuttling protein Mtr2               | <i>Candida albicans</i>                          | P84148.1         |
| Nuclear transport factor 2                            | <i>Rattus norvegicus</i>                         | NP_001007630.1   |
| Nuclear transport factor 2                            | <i>Penicillium roqueforti</i> FM164              | CDM28803.1       |
| Nuclear transport factor 2                            | <i>Drosophila melanogaster</i>                   | AAS98195.1       |
| Phenazine biosynthesis protein A/B                    | <i>Nocardiopsis dassonvillei</i>                 | ADH70409.1       |
| Phenazine biosynthesis protein A/B                    | <i>Pseudomonas</i> sp. GM17                      | EJM14221.1       |
| Phenazine biosynthesis protein A/B                    | <i>Streptomyces pratensis</i> ATCC 33331         | ADW02923.1       |
| Phenazine biosynthesis protein A/B                    | <i>Burkholderia lata</i>                         | ABB11682.1       |
| Ring hydroxylating beta subunit                       | <i>Pseudomonas</i> sp. HMSC05H02                 | KJJ11284.1       |
| Ring hydroxylating beta subunit                       | <i>Corynebacterium ammoniagenes</i> DSM 20306    | EFG82184.1       |
| ring hydroxylating beta subunit                       | <i>Bordetella bronchiseptica</i> B20-10725633    | KDB66946.1       |
| Scytalone dehydratase                                 | <i>Colletotrichum lagenaria</i>                  | BAA13009.1       |
| Scytalone dehydratase                                 | <i>Talaromyces islandicus</i>                    | CRG86684.1       |
| Scytalone dehydratase                                 | <i>Aspergillus flavus</i> AF70                   | KJJ30121.1       |
| Scytalone dehydratase                                 | <i>Marssonina brunnea</i> f. sp. 'multigermtubi' | XP_007296032.1   |

|                               |                                                  |                |
|-------------------------------|--------------------------------------------------|----------------|
| SnoaL-like polyketide cyclase | <i>Saccharomonospora azurea NA-128</i>           | EHY91179.1     |
| SnoaL-like polyketide cyclase | <i>Bradyrhizobium sp. WSM471</i>                 | EHR01507.1     |
| SnoaL-like polyketide cyclase | <i>Bacillus thuringiensis MC28</i>               | AFU13283.1     |
| SnoaL-like polyketide cyclase | <i>Methylobacterium album BG8</i>                | EIC29135.1     |
| Snoa2-A Putative Hydroxylase  | <i>Streptomyces Nogalater</i>                    | 2GEX           |
| Snoa3 -Ketosteroid Isomerase  | <i>Shewanella Frigidimarina</i>                  | 3BB9           |
| Tim44-like domain             | <i>Roseburia intestinalis XB6B4</i>              | CBL12234.1     |
| Tim44-like domain             | <i>Clostridium sp. CAG:492</i>                   | WP_022091013.1 |
| Tim44-like domain             | <i>Ostreococcus tauri</i>                        | CEF99583.1     |
| Tim44-like domain             | <i>Enterococcus sp. 7L76</i>                     | CBL31786.1     |
| VirB8 protein (plasmid)       | <i>Aeromonas caviae</i>                          | YP_067832.1    |
| VirB8 protein                 | <i>Ehrlichia ruminantium str. Welgevonden</i>    | CAI26955.1     |
| VirB8 protein                 | <i>Bartonella tribocorum CIP 105476</i>          | CAK02009.1     |
| VirB8 protein (plasmid)       | <i>Pseudomonas putida</i>                        | YP_008994866.1 |
| VirB8 protein (plasmid)       | <i>Xanthomonas axonopodis pv. citri str. 306</i> | AAM39286.1     |
| Wound-induced protein WI12    | <i>Mesembryanthemum crystallinum</i>             | AAD23999.1     |
| Wound-induced protein WI12    | <i>Burkholderia mallei</i>                       | KGC14241.1     |
| Wound-induced protein WI12    | <i>Zea mays</i>                                  | ACG48358.1     |
